# Supplementary material for: C57BL/6 life span study: age-related declines in muscle power production and contractile velocity
Source: PubMed Central journal article supplement (PMC4401475; doi:10.1007/s11357-015-9773-1), 2015-04-17
Supplement: 11357_2015_9773_MOESM1_ESM.pdf [file 11357_2015_9773_MOESM1_ESM.pdf]

## Online Resource 1

### APPENDIX: Relationships between Force, Velocity, and Maximum Power

In order to evaluate the relationship between velocity, force and maximum power, we examined simple and multiple linear regressions to determine how much variability is explained by each component of power [ $P_0$ , velocity, and incorporating  $\%P_0@P_{max}$  (the percentage of maximum force where the muscle produced maximum power) and age to hierarchical multiple regression analysis]. In the EDL,  $P_0$  explained 58% of the individual variability in  $P_{max}$  ( $P_0$  + age, 66%). At 30% $P_0$  the velocity of contraction explained 23% of  $P_{max}$  (velocity + age, 49%), and when the two components ( $P_0$  and velocity at 30%  $P_0$ ) were combined 73% of  $P_{max}$  variability was explained. Adding a third component, age, 75% of the variability in  $P_{max}$  was explained. In the SOL, the  $P_0$  explains 59% of the individual variability ( $P_0$  + age, not significantly different). At 20% $P_0$  the velocity of contraction explains 50% of the variability (velocity + age, no difference), and when combining the two components, 83% is explained (adding age yields 84% of the variability). (**Online Resource 2, Figure S5**)

For simplicities sake, we will use the convention of V30 to represent velocity ( $v$ ) as measured at 30% of  $P_0$  (30). Simple linear regression demonstrated a strong positive correlation, as would be expected, of EDL  $P_{max}$  with  $P_0$  [ $R=0.79$ ,  $r^2=0.630$ ,  $p\text{-value}<.001$ ; equation:  $P_{max}$  (mN\*fl/s) = -33.48 + 1.36 \*  $P_0$ ]; as well as with contractile velocity at 30% $P_0$  [ $R=0.51$ ,  $r^2=0.260$ ,  $p<.001$ ; equation:  $P_{max}$  (mN\*fl/s) = -0.90 + 102.43 \* v30]. (**Online Resource 2, Figure S5**) We performed a factor analysis (promax rotation) to determine which of the collected outcome variables contributed most to the variability in the system (overall model). The results of our factor analysis yielded that  $P_0$ , v30, v40 and v60 were the main sources of variability in  $P_{max}$ . Interestingly, the only velocity that was not significantly correlated with the EDL  $P_{max}$  was  $V_{max}$ .

After analyzing the velocities separately (**Online Resource 2, Figure S1**), v30 was selected to be used in the multiple regression analysis and the combination of P<sub>0</sub> and v30 explained 79% of the variability in the observed P<sub>max</sub> (R=0.853, r<sup>2</sup>=0.728, p<.001; equation: P<sub>max</sub> (mN\*fl/s) = -316.33 + 1.22 \* P<sub>0</sub> + 77.8 \* v30). %P<sub>0</sub>@P<sub>max</sub> was correlated with P<sub>max</sub> (R=0.398, r<sup>2</sup>=0.159, p=.001), but did not significantly add information when combined with the above multiple regression (R=0.891). When age was incorporated into the model (multiple regression of P<sub>max</sub> with P<sub>0</sub>, V30 and age of mouse); however, the r<sup>2</sup> was increased to 0.749 (coefficient significance p=.032). %P<sub>0</sub>@P<sub>max</sub> was correlated with P<sub>max</sub> (R=0.398, r<sup>2</sup>=0.159, p=0.001), but did not significantly add information when combined to the multiple regression.

P<sub>max</sub> in the SOL followed a similar pattern. Regression of P<sub>max</sub> with P<sub>0</sub> (R=0.762, r<sup>2</sup>=0.577, p<.001; equation: P<sub>max</sub> (mN\*fl/s) = -17.65 + 0.46 \* P<sub>0</sub>); as well as with contractile velocity at v20 [R=0.714, r<sup>2</sup>=0.501, p<.001; equation: P<sub>max</sub> (mN\*fl/s) = -13.78 + 46.78 \* v20] showed strong correlations. A principle component factor analysis revealed that the top 4 factors, in descending order of R-values (in parenthesis), correlating to the P<sub>max</sub> in the SOL were: P<sub>0</sub> (0.762), v20 (0.714), V<sub>max</sub> (0.71) and v30 (0.637). The most explanatory/predictive equation was derived from a regression of P<sub>max</sub> with P<sub>0</sub> and v20 [R=0.915, r<sup>2</sup>=0.837, p<.001; equation: P<sub>max</sub> (mN\*fl/s) = -58.412 + 0.359 \* P<sub>0</sub> + 34.842 \* v30]. In the SOL, the %P<sub>0</sub>@P<sub>max</sub> was not significantly correlated with P<sub>max</sub>.
